# Supplementary material
Source: MDPI journal article supplement (https://www.mdpi.com/2077-0472/13/11/2163)
Supplement: s1 [file s1]

## Supplementary material

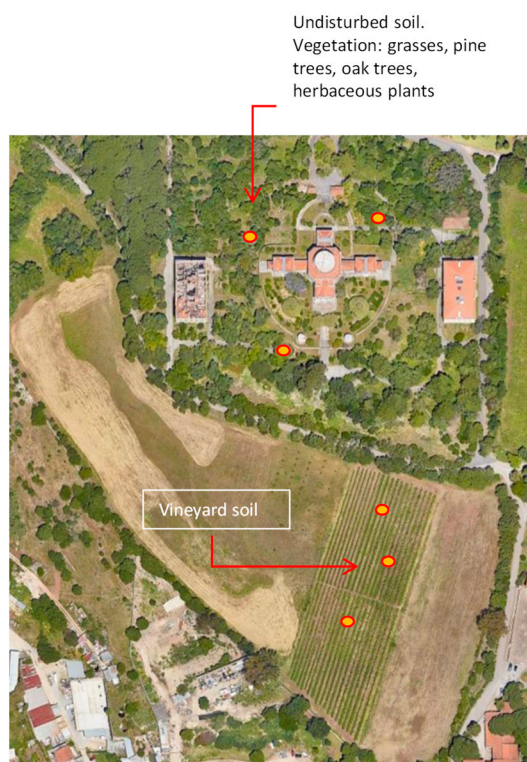

Lisbon-Tapada da Ajuda

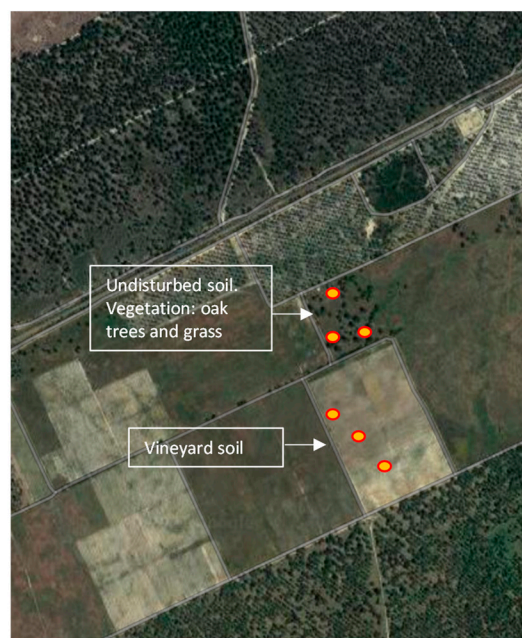

Pegões- PORVID- Central Pole for  
the Conservation of Autochthonous  
Grapevine Variability

**Figure S1.** Sampling sites.

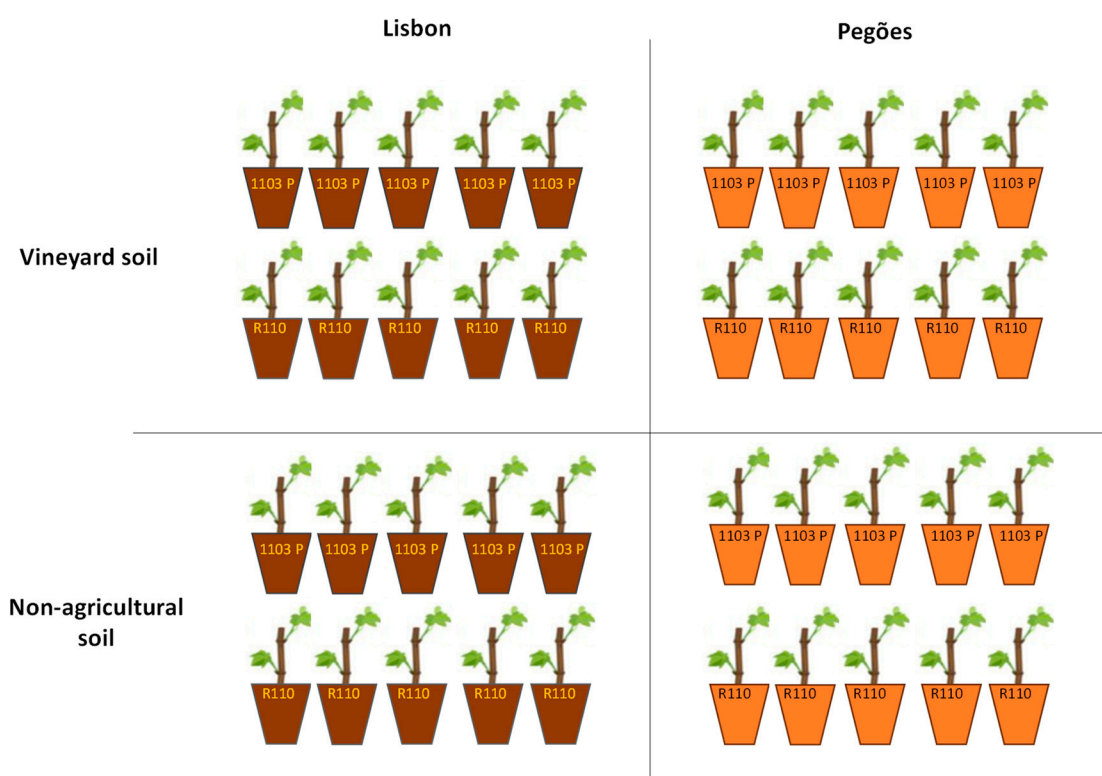

**Figure S2.** Experimental design.

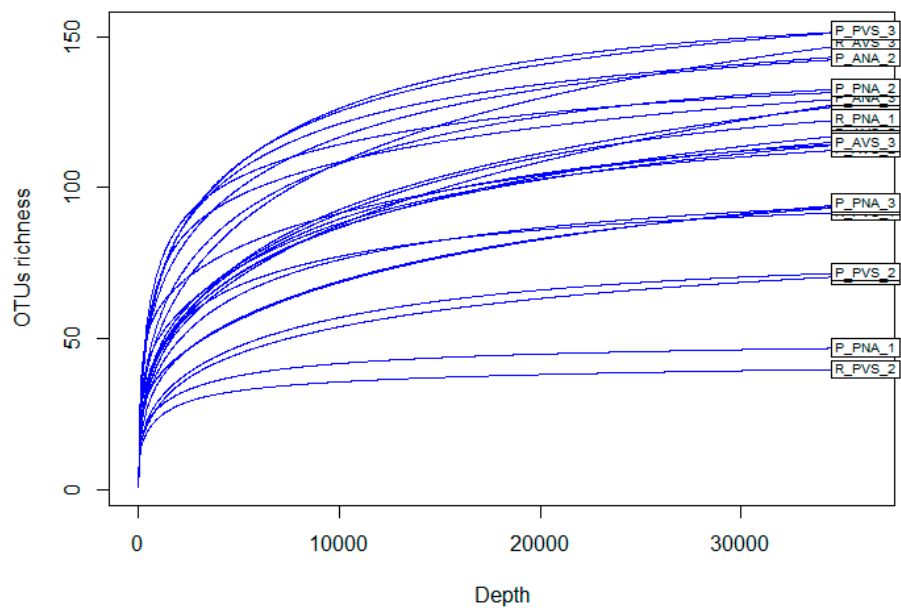

**Figure S3:** Rarefaction curve for assessing the sampling effort.

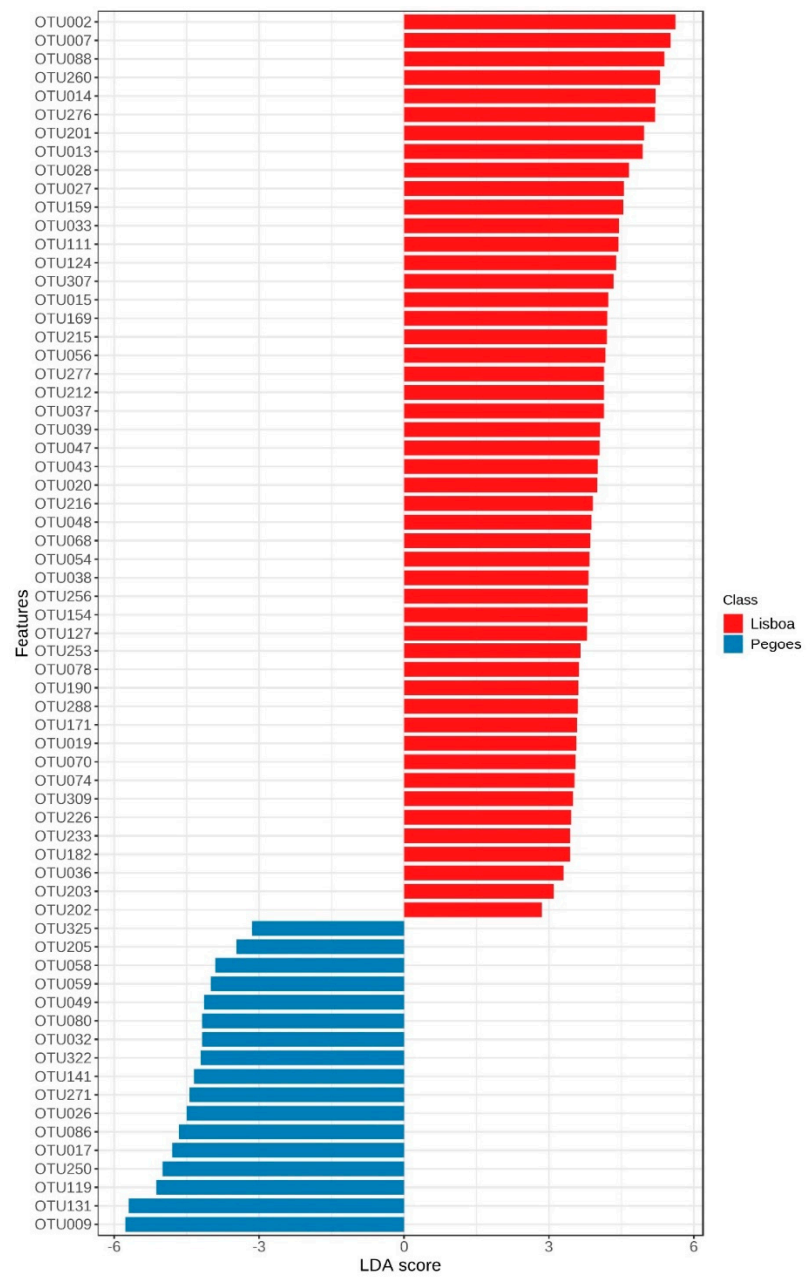

**Figure S4.** Significantly enriched arbuscular mycorrhizal taxa detected by Linear Discriminant analysis of effect size (Lefse) in Lisbon and Pegões soils. Significant differences were defined at  $p < 0.05$  and an LDA score ( $\log \text{LDA}$ )  $> 2.0$ .

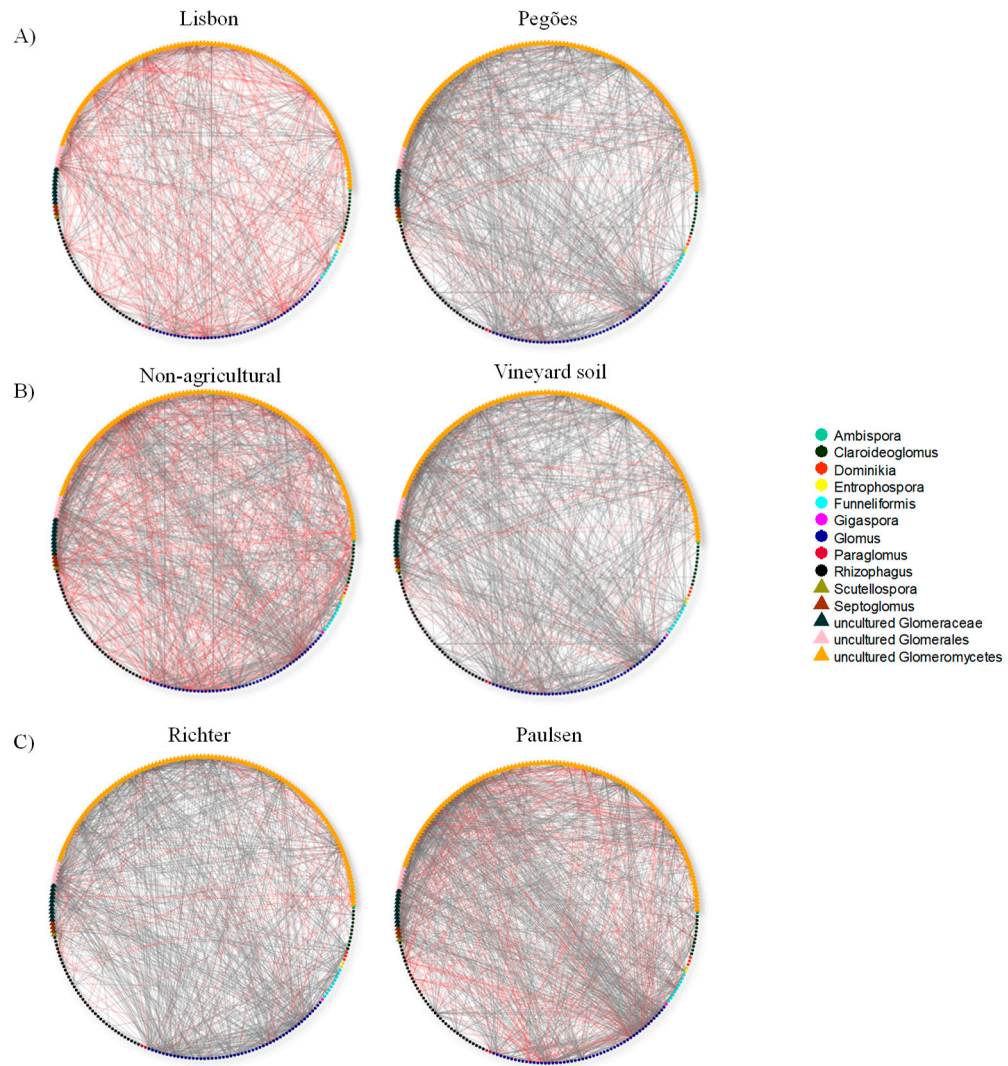

**Figure S5.** Significant co-occurrence networks of grapevine root arbuscular mycorrhizal fungal communities A) in Lisbon and Pegões, B) Non-agricultural soil and vineyard soil and C) in Richter 110 and 1103 Paulsen rootstocks. The nodes of each network represent the taxonomic affiliation of each OTU. Red lines connecting each pair of nodes (OTUs) show negative associations and grey lines show positive ones.



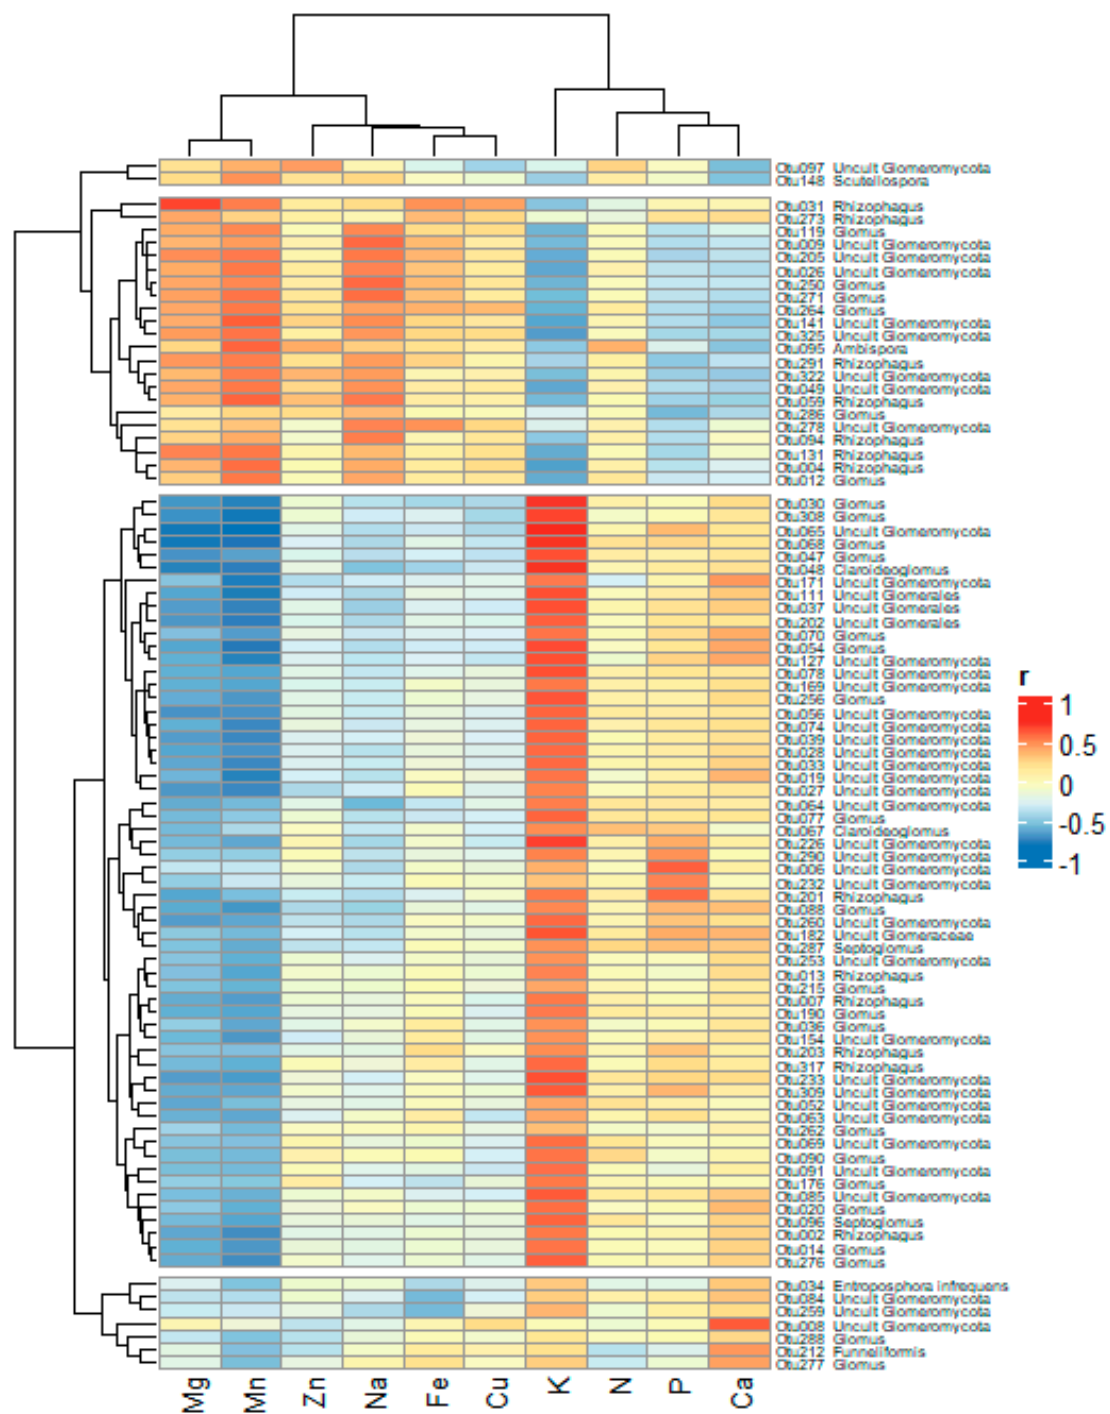

**Figure S6.** Correlation analysis (Spearman) between individual operational taxonomic units (OTUs) of arbuscular mycorrhizal fungi and leaf nutrient concentrations. Only OTUs showing significant correlation ( $p < 0.01$ ) between their relative abundance in roots and leaf nutrient concentrations are shown.

**Table S1.** Correlation analysis (Spearman's  $\rho$ ) between soil physico-chemical properties and  $\alpha$ -diversity indexes. Only correlations with  $p$ -values higher than 0.01 are shown.

| Parameter 1   | Parameter 2  | $\rho$ | $p$ -value |
|---------------|--------------|--------|------------|
| OTU richness  | OC           | 0.83   | 0.01       |
|               | Soil_N       | 0.83   | 0.01       |
| Shannon index | pH           | 0.93   | < 0.01     |
|               | EC           | 0.93   | < 0.01     |
|               | OC           | 0.83   | 0.01       |
|               | Soil_total N | 0.83   | 0.01       |
|               | Soil_K       | 0.93   | < 0.01     |
|               | Soil_Ca      | 0.93   | < 0.01     |
|               | Soil_Zn      | 0.93   | < 0.01     |

**Table S2.** Significantly enriched arbuscular mycorrhizal taxa detected by Linear Discriminant analysis of effect size (Lefse) in Lisbon and Pegões soils.

| OTU number | Order | Family | Genus | Other                    | Relative abundance (%) |        |
|------------|-------|--------|-------|--------------------------|------------------------|--------|
|            |       |        |       |                          | Lisbon                 | Pegoes |
| OTU019     | -     | -      | -     | Uncultured Glomeromycota | 0.08                   | 0.01   |
| OTU027     | -     | -      | -     | Uncultured Glomeromycota | 0.72                   | 0.03   |
| OTU028     | -     | -      | -     | Uncultured Glomeromycota | 0.93                   | 0.03   |
| OTU033     | -     | -      | -     | Uncultured Glomeromycota | 0.59                   | 0.04   |
| OTU039     | -     | -      | -     | Uncultured Glomeromycota | 0.24                   | 0.01   |
| OTU056     | -     | -      | -     | Uncultured Glomeromycota | 0.29                   | 0.01   |
| OTU074     | -     | -      | -     | Uncultured Glomeromycota | 0.07                   | <0.01  |
| OTU078     | -     | -      | -     | Uncultured Glomeromycota | 0.09                   | <0.01  |
| OTU127     | -     | -      | -     | Uncultured Glomeromycota | 0.11                   | <0.01  |
| OTU154     | -     | -      | -     | Uncultured Glomeromycota | 0.14                   | 0.01   |
| OTU169     | -     | -      | -     | Uncultured Glomeromycota | 0.34                   | 0.01   |
| OTU171     | -     | -      | -     | Uncultured Glomeromycota | 0.08                   | <0.01  |
| OTU216     | -     | -      | -     | Uncultured Glomeromycota | 0.16                   | <0.01  |
| OTU226     | -     | -      | -     | Uncultured Glomeromycota | 0.08                   | 0.02   |
| OTU233     | -     | -      | -     | Uncultured Glomeromycota | 0.06                   | <0.01  |
| OTU253     | -     | -      | -     | Uncultured Glomeromycota | 0.10                   | 0.01   |
| OTU260     | -     | -      | -     | Uncultured Glomeromycota | 4.09                   | 0.16   |
| OTU309     | -     | -      | -     | Uncultured Glomeromycota | 0.09                   | 0.03   |



| OTU<br>number | Order      | Family               | Genus                  | Other                  | Relative abundance<br>(%) |        |
|---------------|------------|----------------------|------------------------|------------------------|---------------------------|--------|
|               |            |                      |                        |                        | Lisbon                    | Pegoes |
| OTU037        | Glomerales | -                    | -                      | Uncultured Glomerales  | 0.30                      | <0.01  |
| OTU111        | Glomerales | -                    | -                      | Uncultured Glomerales  | 0.54                      | 0.01   |
| OTU202        | Glomerales | -                    | -                      | Uncultured Glomerales  | 0.02                      | <0.01  |
| OTU048        | Glomerales | Claroideoglomeraceae | <i>Claroideoglomus</i> | -                      | 0.15                      | <0.01  |
| OTU038        | Glomerales | Glomeraceae          | -                      | Uncultured Glomeraceae | 0.15                      | 0.02   |
| OTU124        | Glomerales | Glomeraceae          | -                      | Uncultured Glomeraceae | 0.53                      | 0.05   |
| OTU182        | Glomerales | Glomeraceae          | -                      | Uncultured Glomeraceae | 0.06                      | <0.01  |
| OTU307        | Glomerales | Glomeraceae          | -                      | Uncultured Glomeraceae | 0.51                      | 0.09   |
| OTU015        | Glomerales | Glomeraceae          | <i>Funneliformis</i>   | -                      | 0.38                      | 0.02   |
| OTU212        | Glomerales | Glomeraceae          | <i>Funneliformis</i>   | -                      | 0.27                      | 0.01   |
| OTU020        | Glomerales | Glomeraceae          | <i>Glomus</i>          | -                      | 0.21                      | 0.01   |
| OTU014        | Glomerales | Glomeraceae          | <i>Glomus</i>          | -                      | 3.67                      | 0.5    |
| OTU036        | Glomerales | Glomeraceae          | <i>Glomus</i>          | -                      | 0.05                      | <0.01  |
| OTU047        | Glomerales | Glomeraceae          | <i>Glomus</i>          | -                      | 0.22                      | <0.01  |
| OTU054        | Glomerales | Glomeraceae          | <i>Glomus</i>          | -                      | 0.13                      | <0.01  |
| OTU068        | Glomerales | Glomeraceae          | <i>Glomus</i>          | -                      | 0.13                      | <0.01  |
| OTU070        | Glomerales | Glomeraceae          | <i>Glomus</i>          | -                      | 0.07                      | <0.01  |
| OTU088        | Glomerales | Glomeraceae          | <i>Glomus</i>          | -                      | 5.27                      | 0.51   |
| OTU159        | Glomerales | Glomeraceae          | <i>Glomus</i>          | -                      | 0.69                      | 0.01   |
| OTU190        | Glomerales | Glomeraceae          | <i>Glomus</i>          | -                      | 0.1                       | 0.02   |

| OTU number | Order      | Family      | Genus              | Other                    | Relative abundance (%) |        |
|------------|------------|-------------|--------------------|--------------------------|------------------------|--------|
|            |            |             |                    |                          | Lisbon                 | Pegoes |
| OTU215     | Glomerales | Glomeraceae | <i>Glomus</i>      | -                        | 0.41                   | 0.11   |
| OTU256     | Glomerales | Glomeraceae | <i>Glomus</i>      | -                        | 0.13                   | <0.01  |
| OTU276     | Glomerales | Glomeraceae | <i>Glomus</i>      | -                        | 3.32                   | 0.26   |
| OTU277     | Glomerales | Glomeraceae | <i>Glomus</i>      | -                        | 0.27                   | 0.01   |
| OTU288     | Glomerales | Glomeraceae | <i>Glomus</i>      | -                        | 0.09                   | <0.01  |
| OTU002     | Glomerales | Glomeraceae | <i>Rhizophagus</i> | -                        | 9.56                   | 1.47   |
| OTU007     | Glomerales | Glomeraceae | <i>Rhizophagus</i> | -                        | 7.35                   | 0.85   |
| OTU013     | Glomerales | Glomeraceae | <i>Rhizophagus</i> | -                        | 2.06                   | 0.35   |
| OTU201     | Glomerales | Glomeraceae | <i>Rhizophagus</i> | -                        | 2.32                   | 0.5    |
| OTU203     | Glomerales | Glomeraceae | <i>Rhizophagus</i> | -                        | 0.03                   | 0.01   |
| OTU043     | Glomerales | Glomeraceae | <i>Septoglomus</i> | -                        | 0.2                    | <0.01  |
| OTU009     | -          | -           | -                  | Uncultured Glomeromycota | 0.74                   | 12.47  |
| OTU017     | -          | -           | -                  | Uncultured Glomeromycota | 0.05                   | 1.3    |
| OTU026     | -          | -           | -                  | Uncultured Glomeromycota | 0.01                   | 0.64   |
| OTU141     | -          | -           | -                  | Uncultured Glomeromycota | 0.01                   | 0.47   |
| OTU205     | -          | -           | -                  | Uncultured Glomeromycota | <0.01                  | 0.06   |
| OTU322     | -          | -           | -                  | Uncultured Glomeromycota | <0.01                  | 0.33   |
| OTU325     | -          | -           | -                  | Uncultured Glomeromycota | <0.01                  | 0.02   |
| OTU080     | -          | -           | -                  | Uncultured Glomeromycota | <0.01                  | 0.290  |
| OTU049     | -          | -           | -                  | Uncultured Glomeromycota | 0.01                   | 0.280  |
| OTU058     | -          | -           | -                  | Uncultured Glomeromycota | <0.01                  | 0.16   |

| OTU<br>number | Order          | Family          | Genus              | Other | Relative abundance<br>(%) |        |
|---------------|----------------|-----------------|--------------------|-------|---------------------------|--------|
|               |                |                 |                    |       | Lisbon                    | Pegoes |
| OTU119        | Glomerales     | Glomeraceae     | <i>Glomus</i>      | -     | 0.18                      | 2.93   |
| OTU250        | Glomerales     | Glomeraceae     | <i>Glomus</i>      | -     | 0.18                      | 2.20   |
| OTU271        | Glomerales     | Glomeraceae     | <i>Glomus</i>      | -     | 0.03                      | 0.55   |
| OTU059        | Glomerales     | Glomeraceae     | <i>Rhizophagus</i> | -     | <0.01                     | 0.2    |
| OTU086        | Glomerales     | Glomeraceae     | <i>Rhizophagus</i> | -     | 0.07                      | 0.97   |
| OTU131        | Glomerales     | Glomeraceae     | <i>Rhizophagus</i> | -     | 3.16                      | 12.97  |
| OTU032        | Paraglomerales | Paraglomeraceae | <i>Paraglomus</i>  | -     | <0.01                     | 0.3    |

**Table S3.** Leaf nutrient concentration in Aragonez variety grapevines grafted onto Richter 110 (R110) or 1103 Paulsen (1103 P) rootstocks grown in vineyard (VS) or non-agricultural soils (NAS) from Lisbon and Pegões. Data indicate average values  $\pm$  standard error ( $n=3$ ). Different letters indicate significant differences between experimental groups according to Duncan mean comparison test.

| Location | Land use | Rootstock | N                         | P                       | K                        | Ca                        | Mg                       | Na                        | Mn                        | Fe                          | Zn                        | Cu                        |
|----------|----------|-----------|---------------------------|-------------------------|--------------------------|---------------------------|--------------------------|---------------------------|---------------------------|-----------------------------|---------------------------|---------------------------|
| Pegões   | NAS      | R 110     | 22.49 $\pm$<br>1.413 ab   | 1.16 $\pm$<br>0.128 a   | 9.29 $\pm$<br>0.440<br>c | 7.48 $\pm$<br>1.457<br>b  | 4.91 $\pm$<br>0.087 ab   | 0.86 $\pm$<br>0.066<br>a  | 0.25 $\pm$<br>0.010<br>a  | 124.63 $\pm$<br>8.878<br>a  | 25.32 $\pm$<br>3.266<br>b | 92.73 $\pm$ 30.905<br>ab  |
|          |          |           | 24.23 $\pm$<br>1.115<br>a | 1.49 $\pm$<br>0.166 a   | 14.94 $\pm$<br>0.862 b   | 5.78 $\pm$<br>0.188<br>b  | 4.77 $\pm$<br>0.235 bc   | 0.74 $\pm$<br>0.149<br>ab | 0.31 $\pm$<br>0.012<br>a  | 126.61 $\pm$<br>19.916 a    | 33.81 $\pm$<br>1.536<br>a | 48.84 $\pm$ 32.728<br>b   |
|          |          | VS        | 21.67 $\pm$<br>0.504 ab   | 1.41 $\pm$<br>0.131 a   | 14.63 $\pm$<br>1.678 b   | 9.29 $\pm$<br>1.435<br>ab | 4.07 $\pm$<br>0.534 cd   | 0.83 $\pm$<br>0.0815 ab   | 0.10 $\pm$<br>0.036 abc   | 116.14 $\pm$<br>4.357<br>a  | 24.26 $\pm$<br>2.619 bc   | 141.70 $\pm$ 81.062<br>a  |
|          |          |           | 20.32 $\pm$<br>0.939<br>b | 1.52 $\pm$<br>0.074 a   | 14.52 $\pm$<br>2.123 b   | 10.45 $\pm$<br>0.714<br>a | 5.53 $\pm$<br>0.415<br>a | 0.55 $\pm$<br>0.071<br>ab | 0.12 $\pm$<br>0.023<br>a  | 142.86 $\pm$<br>20.204<br>a | 24.3 $\pm$<br>1.273<br>bc | 113.18 $\pm$ 34.628<br>ab |
| Lisbon   | NAS      | R 110     | 22.82 $\pm$<br>1.212 ab   | 1.52 $\pm$<br>0.00<br>a | 21.77 $\pm$<br>0.720 a   | 9.83 $\pm$<br>0.106<br>ab | 3.09 $\pm$<br>0.329<br>e | 0.64 $\pm$<br>0.194<br>ab | 0.04 $\pm$<br>0.003<br>b  | 112.19 $\pm$<br>8.071<br>a  | 25.25 $\pm$<br>1.997<br>b | 41.98 $\pm$ 21.434<br>b   |
|          |          | 1103 P    | 21.17 $\pm$<br>2.321 ab   | 1.18 $\pm$<br>0.389 a   | 20.53 $\pm$<br>2.094 a   | 10.16 $\pm$<br>0.783 ab   | 3.52 $\pm$<br>0.308 de   | 0.53 $\pm$<br>0.141<br>ab | 0.04 $\pm$<br>0.004<br>b  | 112.46 $\pm$<br>5.891<br>a  | 23.81 $\pm$<br>2.642 bc   | 48.10 $\pm$ 17.347<br>b   |
|          | VS       | R 110     | 20.38 $\pm$<br>1.056<br>b | 1.37 $\pm$<br>0.111 a   | 14.03 $\pm$<br>1.048 b   | 11.86 $\pm$<br>0.397<br>a | 4.62 $\pm$<br>0.061 bc   | 0.66 $\pm$<br>0.255<br>ab | 0.06 $\pm$<br>0.008<br>bc | 172.79 $\pm$<br>47.985<br>a | 19.74 $\pm$<br>0.235<br>c | 75.63 $\pm$ 10.085<br>ab  |
|          |          | 1103 P    | 23.36 $\pm$<br>1.151 ab   | 1.72 $\pm$<br>0.205 a   | 16.72 $\pm$<br>0.784 b   | 10.38 $\pm$<br>1.151 ab   | 4.11 $\pm$<br>0.295 cd   | 0.07 $\pm$<br>0.004 abc   | 0.50 $\pm$<br>0.131<br>b  | 113.12 $\pm$<br>17.390<br>a | 22.38 $\pm$<br>2.576 bc   | 74.28 $\pm$ 32.744<br>ab  |
